# Supplementary material
Source: PubMed Central journal article supplement (PMC6048596)
Supplement: NIHMS974596-supplement-1.pdf [file NIHMS974596-supplement-1.pdf]

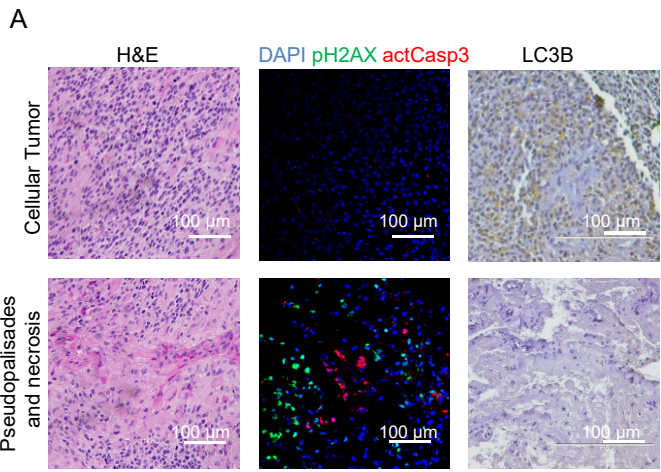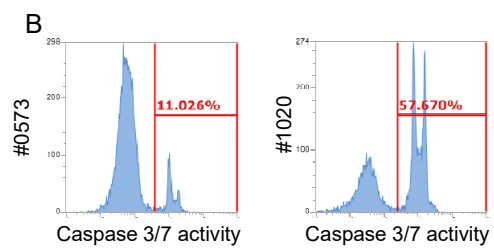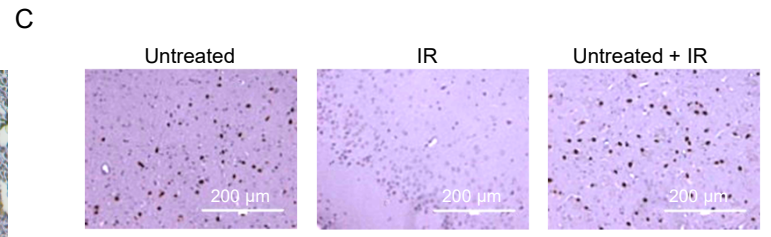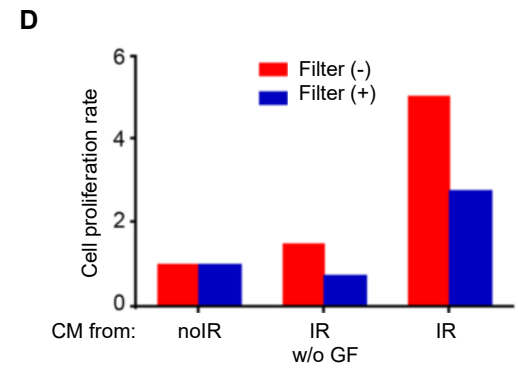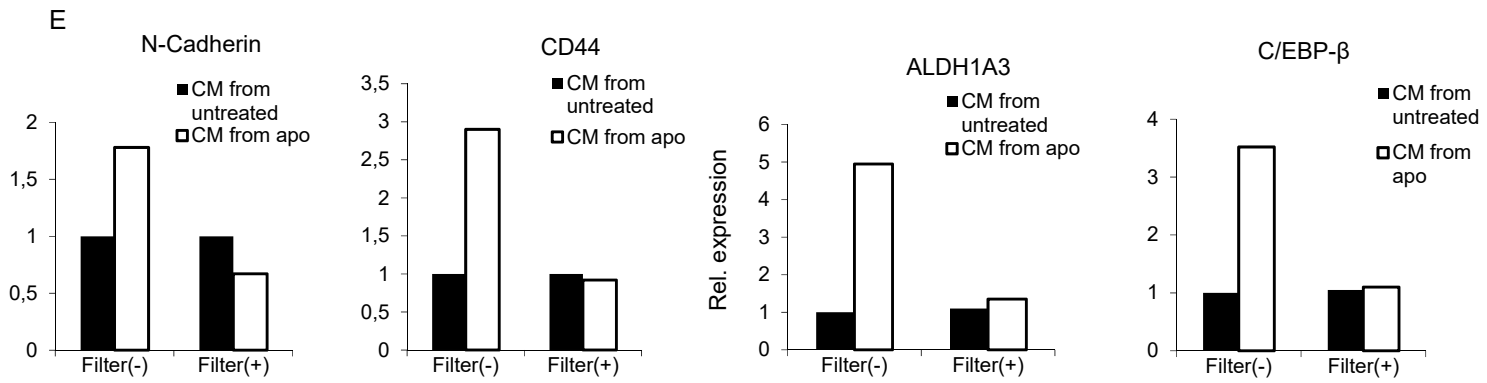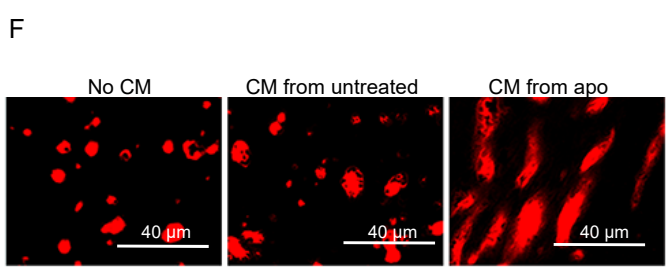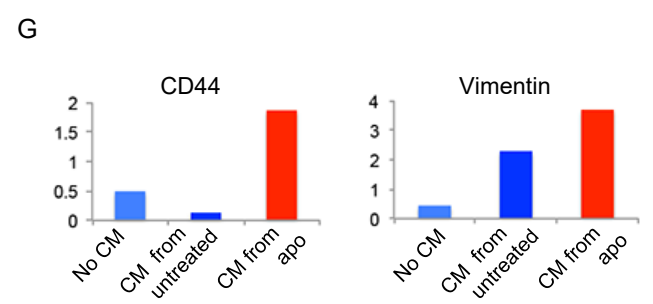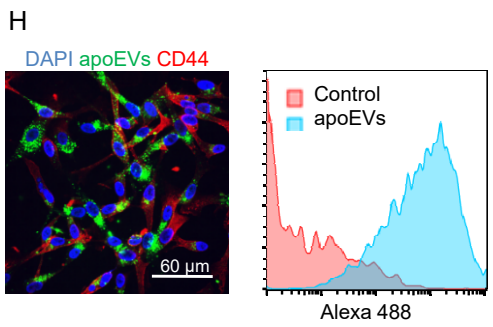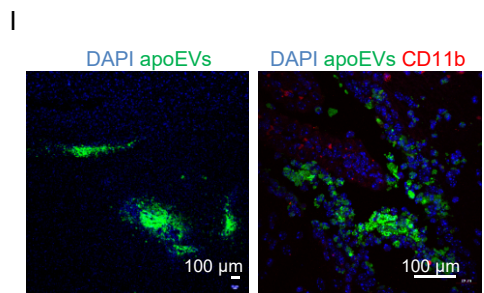

**Figure S1 (Related to Figure 1). Apoptotic GBM cells promote more aggressive phenotype of surviving GBM cells**

- (A) H&E staining of sections obtained from different regions of the same GBM tumor (left panel). Staining of GBM tumor sections with DAPI (blue) antibodies against phospho-H2AX (green) and activated Caspase-3 (red) (middle panel). Immunohistochemical staining of GBM tumor sections with antibodies against LC3B (right panel).
- (B) Flow cytometry analysis of caspase 3/7 activity in freshly dissociated GBM tumors from n=5 different patients.
- (C) Representative images of mouse brain sections stained for human nuclear antigen after intracranial transplantation of untreated 157 glioma spheres alone, lethally irradiated GBM157 spheres alone, or both together (ratio 1:1). n=5 mice per group.
- (D) *In vitro* cell growth assay of GBM157 spheres cultivated for 7 days with conditioned medium from irradiated or non irradiated GBM157 cells. Conditioned medium was either filtered or unfiltered.
- (E) qRT-PCR analysis of CD44, ALDH1A3, N-Cadherin and C/EBP- $\beta$  expression in 157 glioma spheres that were cultivated with either filtered (0.1  $\mu$ m pore size filter) or unfiltered conditioned medium from GBM157 cells that were either untreated or lethally irradiated and incubated for 4 days prior to medium collection. PCR data were normalized to GAPDH expression level.
- (F) Mouse brain sections stained for human Nestin after intracranial transplantation of 157 glioma spheres that were either untreated or pretreated with conditioned medium from irradiated or non-irradiated 157 cells.
- (G) Quantification of CD44 and Vimentin expression in brain sections obtained as in “E”.
- (H) *In vitro* uptake of apoEVs into GBM neurospheres. apoEVs were isolated from lethally-irradiated GBM157 neurospheres and labeled with Alexa Fluor 488 5-TFP (green). After extensive washing, labeled apoEVs were added into culture medium of GBM157 spheres. At 16 hr, GBM neurospheres were observed under the confocal microscope (left panel) and analyzed by FACS (right panel).
- (I) *In vivo* uptake of apoEVs into GBM cells. apoEVs were labeled as in “G” (green) and injected into intracranial tumor that was formed by GBM374 neurospheres. At 16 hr post-injection, mice were sacrificed and brain sections were stained with antibodies against CD11b (red) and observed under the confocal microscope. Left image – low magnification, right image – high magnification stained with antibodies against CD11b. Injection site is indicated with arrow.

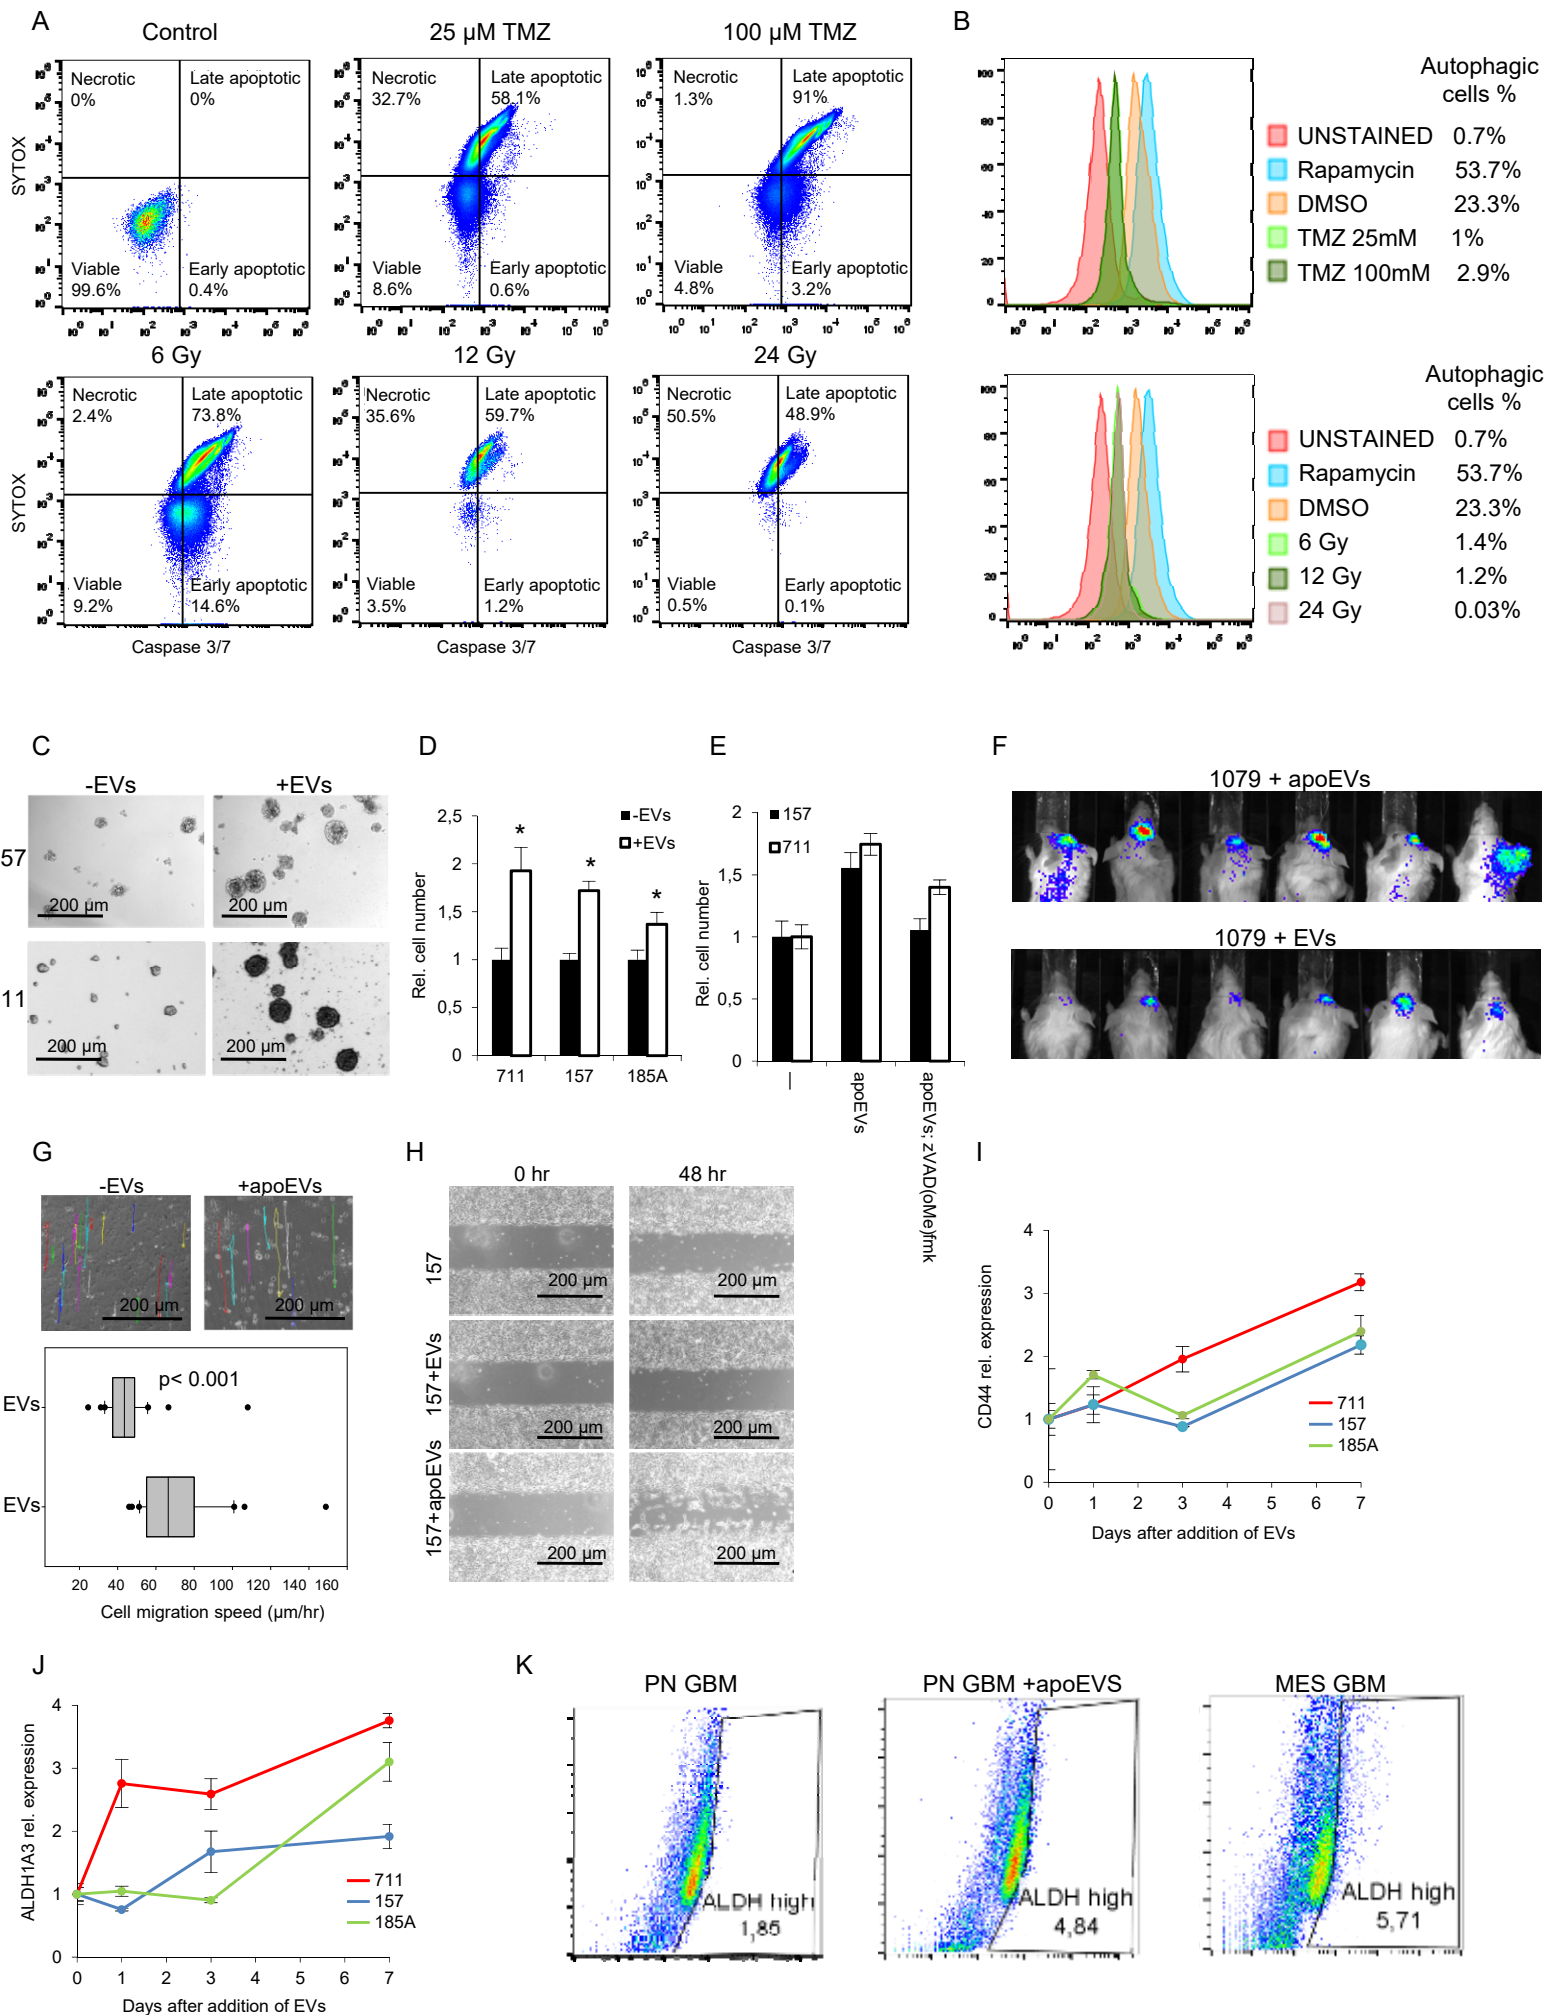

**Figure S2 (Related to Figures 1 and 2). apoEVs promote a more aggressive phenotype of GBM cells**

(A) Flow cytometry analysis of caspase 3/7 activity and SYTOX staining of GBM157 neurospheres treated with different doses of irradiation or temozolomide for 4 days.

(B) Flow cytometry analysis of autophagy in the samples as in “A”. Levels of necrosis, apoptosis and autophagy are indicated. Cells treated with rapamycin for 24 hr were used as a positive control to detect autophagy.

(C) Representative Images of GBM157 and GBM711 glioma spheres cultivated for 4 days with or without apoEVs from corresponding cell line.

(D) Cell counting with Countess II (Thermo scientific) of GBM157, GBM711 or GBM0185 spheres cultivated for 7 days with or without apoEVs obtained from corresponding cell lines.

(E) *In vitro* cell growth assay of GBM157 and GBM711 spheres cultivated for 7 days with EVs from corresponding cell lines. EVs donor cells were either untreated, or lethally irradiated and incubated for 4 days in the presence or absence of 20  $\mu$ M pan-caspase inhibitor zVAD(OMe)fmk.

(F) Representative bioluminescence images of mice intracranially injected with  $2 \cdot 10^5$  luciferase labeled GBM1079 neurospheres in the presence of apoEVs produced by lethally irradiated neurospheres from the same patient (apoEVs) or by untreated neurospheres from the same patient (control EVs).

(G) Upper panel- Representative track pattern of individual GBM157 cells that were either untreated or cultivated with apoEVs for 4 days prior to assay. Lower panel- Clonal motility assay of untreated GBM0185 cells and GBM0185 cells that were cultivated with apoEVs for 4 days prior to assay. n=50 cells from two independent experiments. The line in the box is the median, the left and right of the box are the first and third quartiles, and the whiskers extend to 10th and 90th percentiles respectively.

(H) Wound healing assay with untreated GBM157 cells and GBM157 cells that were cultivated with apoEVs or control EVs for 4 days prior to assay.

(I) qRT-PCR analysis of CD44 expression in GBM157, GBM711 and GBM0185 glioma spheres at different time points of cultivation with apoEVs from corresponding cell line. PCR data were normalized to GAPDH expression level.

(J) qRT-PCR analysis of ALDH1A3 expression in GBM157, GBM711 and GBM0185 glioma spheres at different time points of cultivation with apoEVs from corresponding cell line. PCR data were normalized to GAPDH expression level.

(K) FACS analysis with ALDEFLUOR staining of control GBM157 spheres (PN) and spheres that were cultivated with apoEVs for 4 days. 267 spheres (MES) were used as a positive control.

All quantitative data are average  $\pm$  SD; \*p < 0.01.

**A**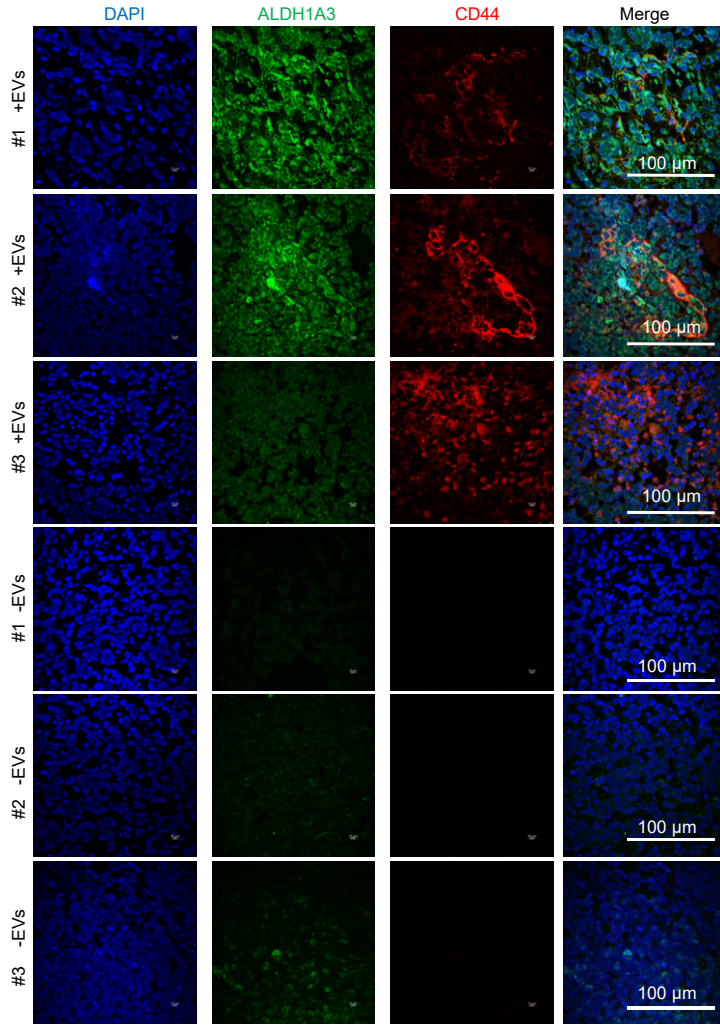**B**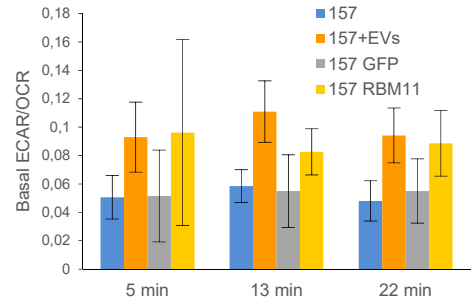**C**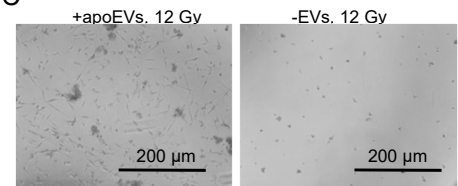**D**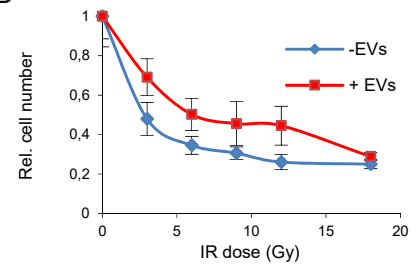**E**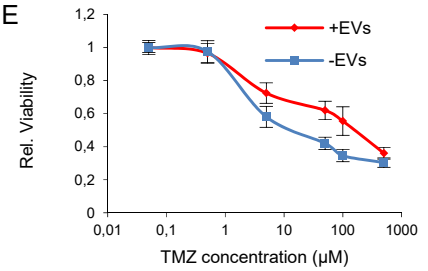**F**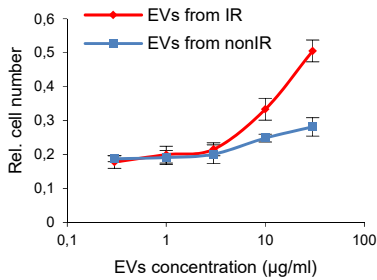**G**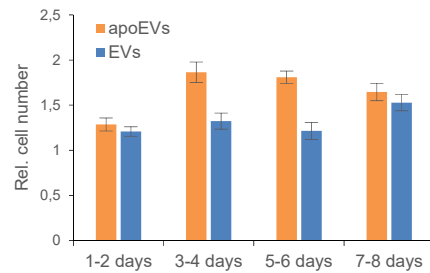**H**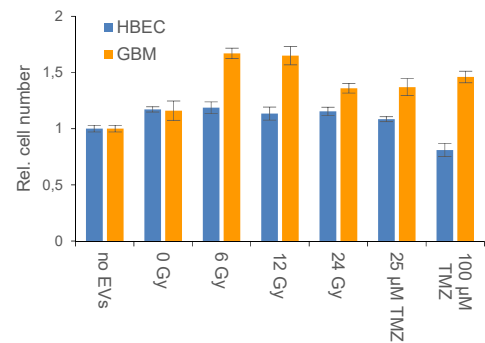**I**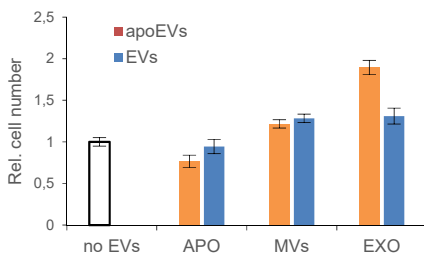**J**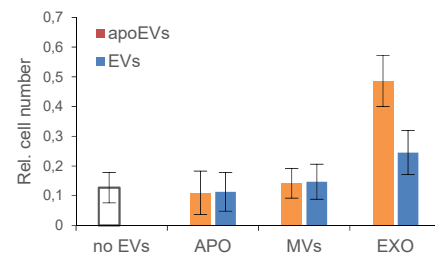**K**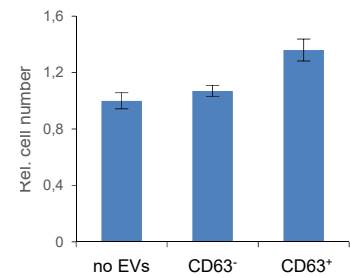

**Figure S3 (Related to Figure 2). apoEVs increase expression of MES markers *in vivo* and therapy resistance *in vitro***

(A) Images of mouse brain sections obtained after intracranial transplantation of 711 glioma spheres alone or together with apoEVs and stained for DNA (blue), ALDH1A3 (green), and CD44 (red).

(B) Ratio of basal extracellular acidification rate (ECAR) and oxygen consumption rate (OCR) measured by a Seahorse Bioanalyzer in GBM157 neurospheres that were either untreated or pretreated with apoEVs for 4 days and in GBM157 neurospheres stably expressing GFP or GFP-RBM11.

(C) Representative images of 157 glioma cells that were either untreated or cultivated with apoEVs for 3 days, followed by irradiation at 12 Gy and incubated for 7 days. In apoEVs treated samples remain the substantial number of viable cells, while in untreated sample, irradiation eliminated nearly all cells.

(D, E) *In vitro* cell viability assay of 711 glioma spheres cultivated with or without apoEVs for 3 days, followed by treatment with various concentrations of temozolomide (TMZ) or different doses of irradiation for 7 days.

(F) *In vitro* cell viability assay of 157 glioma spheres cultivated with various concentrations apoEVs or control EVs for 3 days, followed by treatment with of 5  $\mu$ M of TMZ for 7 days.

(G) *In vitro* cell growth assay of GBM157 neurospheres cultivated for 7 days with EVs secreted by GBM157 neurospheres for indicated periods of time after 6Gy irradiation (apoEVs) or by untreated GBM157 neurospheres (control EVs).

(H) *In vitro* cell growth assay of GBM157 neurospheres cultivated for 7 days with apoEVs produced by GBM157 neurospheres or human brain endothelial cells (HBEC) that were untreated or treated with 6 Gy, 12 Gy, 24 Gy doses of irradiation or with 25  $\mu$ M or 100  $\mu$ M of temozolomide.

(I) *In vitro* cell growth assay of GBM157 spheres cultivated for 7 days with apoEVs or control EVs isolated by centrifugation at 2 000g (apoptotic body: APO), 16 000g (microvesicles: MVs) and 120 000g (exosomes: EXO).

(J) *In vitro* cell viability assay of GBM157 neurospheres cultivated with or without different fractions of apoEVs or control EVs for 3 days, followed by 3 Gy irradiation.

(K) *In vitro* cell growth assay of GBM157 spheres cultivated for 7 days with CD63<sup>+</sup> and CD63<sup>-</sup> fractions of apoEVs.

All quantitative data are average  $\pm$  SD; \*p < 0.01.

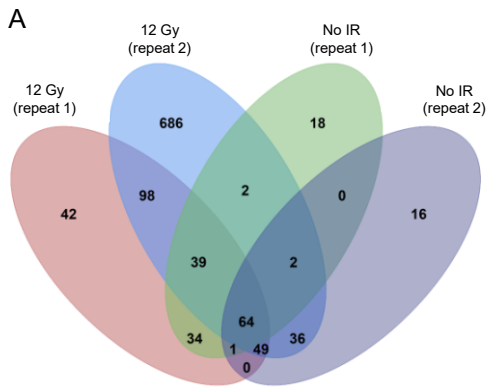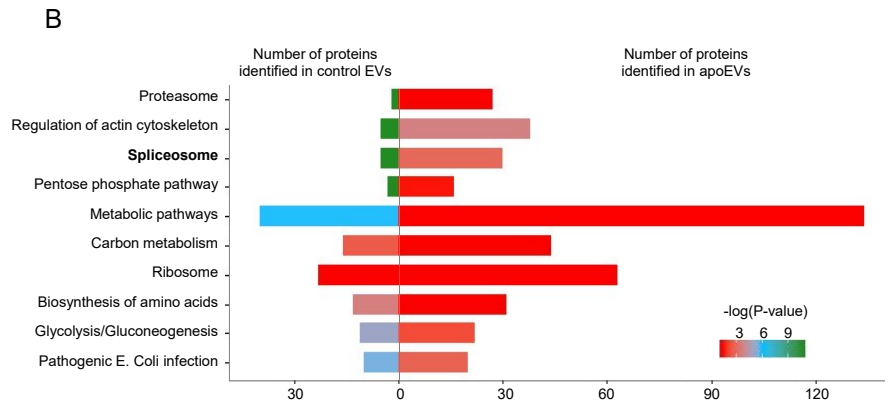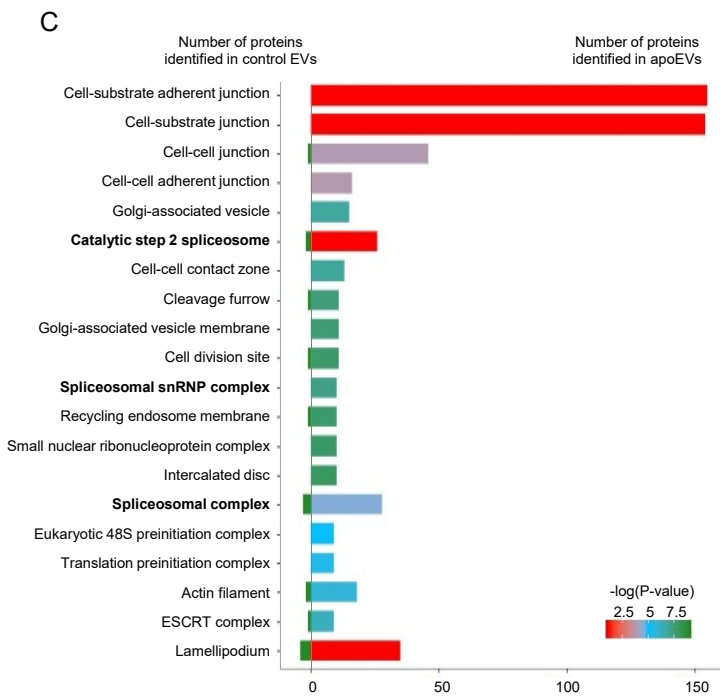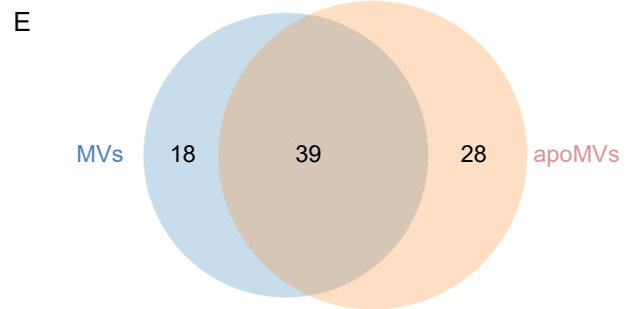

| Biological Process (GO)                  | Gene count | FDR     |
|------------------------------------------|------------|---------|
| Protein folding                          | 7          | 0.00013 |
| Response to organic substance            | 14         | 0.00354 |
| Regulation of biological quality         | 14         | 0.0242  |
| Response to endoplasmic reticulum stress | 5          | 0.0261  |
| Response to chemical                     | 15         | 0.0342  |

| KEGG Pathways                               | Gene count | FDR      |
|---------------------------------------------|------------|----------|
| Protein processing in endoplasmic reticulum | 7          | 6.63e-07 |
| Thyroid hormone synthesis                   | 4          | 0.0004   |

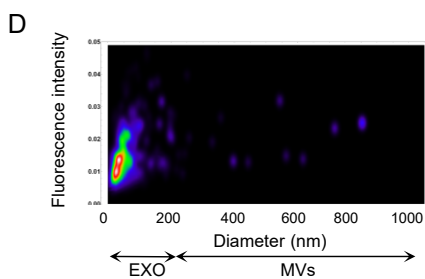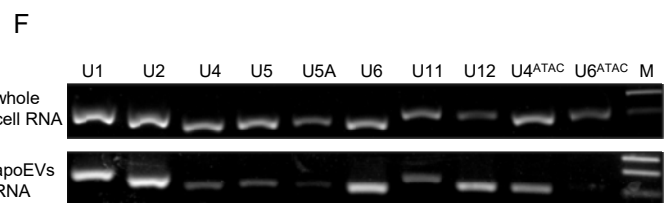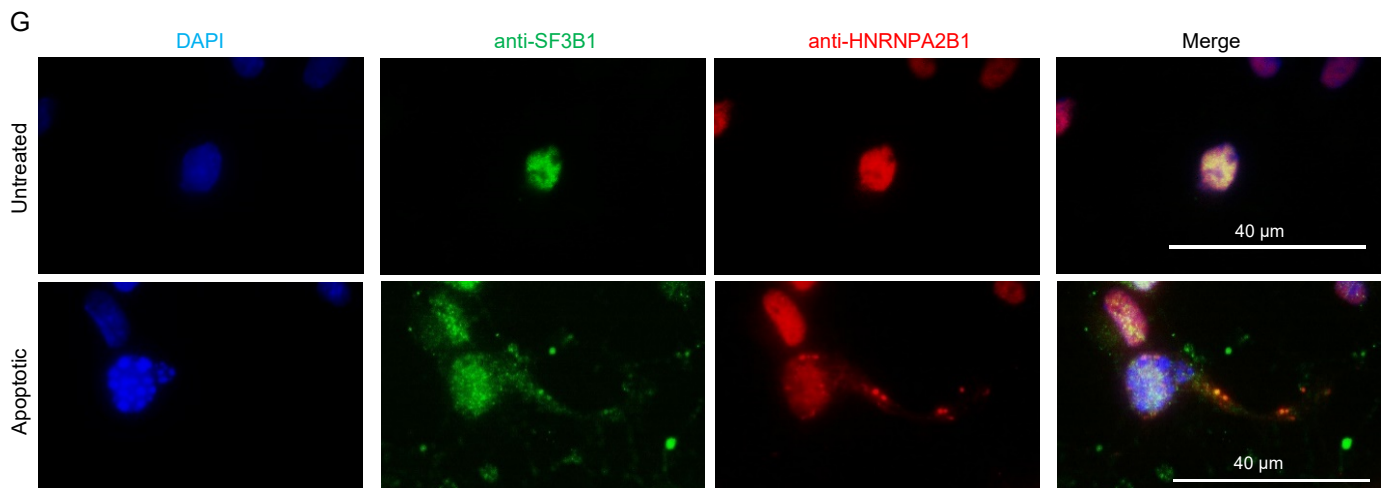

**Figure S4 (Related to Figures 3 and 4). apoEVs are enriched with spliceosomal proteins and U snRNAs**

(A) Distribution of proteins identified in apoEVs and control EVs during biological and technical replicates of LC-MS/MS experiment.

(B and C) Analysis of proteins identified by LC-MS/MS in apoEVs and control EVs with KEGG database (B) or GO Cellular Component database (C).

(D) Fluorescent NTA analysis of apoEVs produced by GBM157 spheres. Vesicles were stained with Alexa 555 labeled anti-U2AF2 antibodies.

(E) Venn diagram representing the distribution of proteins in microvesicles produced by apoptotic (apoMVs) and untreated (MVs) 157GBM cells. (upper panel) Analysis of proteins identified by LC-MS/MS in apoMVs and control MVs with GO Biological Process and KEGG databases (lower panel).

(F) RT-PCR analysis of different U snRNAs purified from either apoEVs or parental cells.

(G) Immunofluorescent staining of GBM157 neurospheres after induction of apoptosis with 50  $\mu$ M of cisplatin. Cells were stained with DAPI (blue), anti-SF3B1 (green) and anti-HNRNPA2B1 (red) antibodies.



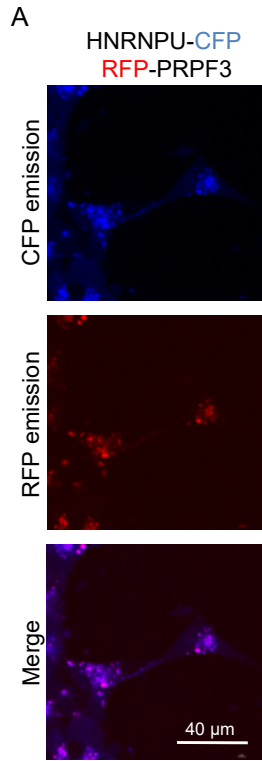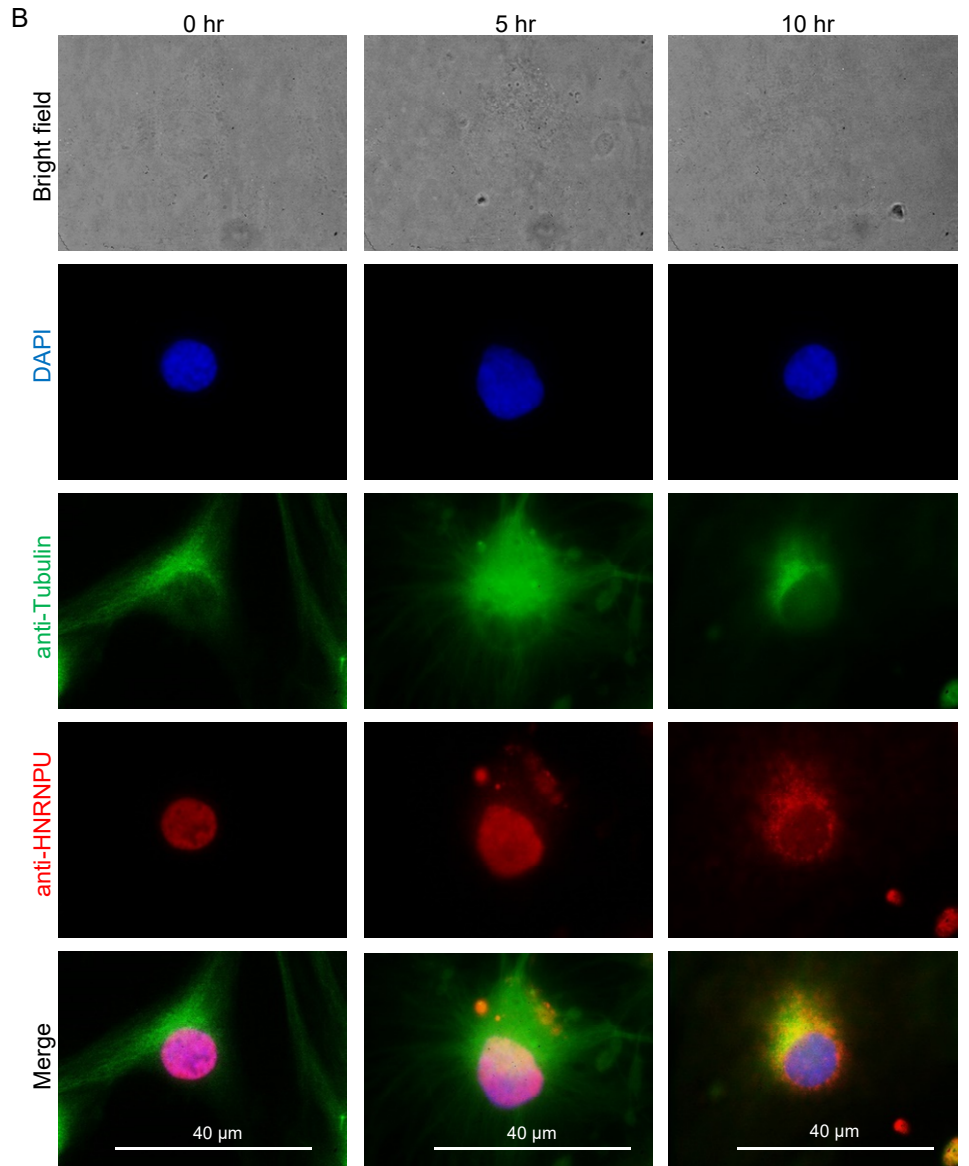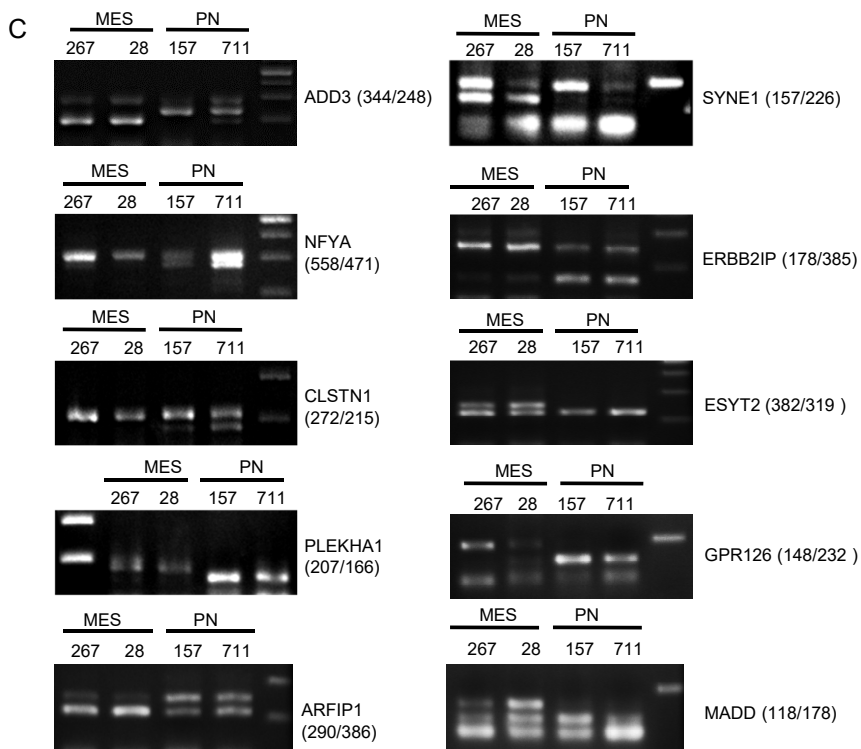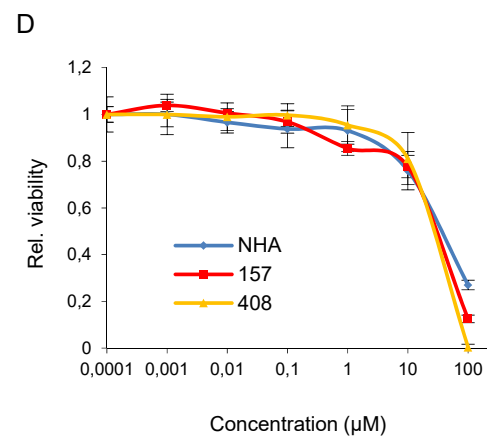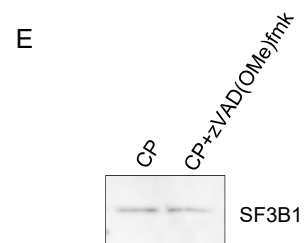

**Figure S5 (Related to Figures 4 and 5). Spliceosomal proteins are exported from apoptotic cells in a caspase-dependent manner and induce splicing changes in recipient cells**

(A) Fluorescence images of GBM157 cells co-transfected with pTagRFP-PRPF3 (red) and pEYFP-HNRNPU-CFP (blue) plasmids. At 24 hr after transfection, cells were treated with 50  $\mu$ M of cisplatin (CP) for 10 hr and observed under confocal microscope.

(B) Immunofluorescent staining of GBM157 neurospheres at different time points after induction of apoptosis with 50  $\mu$ M of cisplatin. Cells were stained with DAPI (blue), anti- $\alpha$ Tubulin antibody (green) and anti-C terminal region of HNRNPU antibody (red).

(C) Validation of the RNA-sequencing data by RT-PCR analysis for splicing of different mRNAs identified from two MES (267 and 28) and two PN (157, 711) sphere samples. Lengths of alternative splicing products are indicated.

(D) In vitro viability assay of GBM spheres from two different patients and normal human astrocytes (NHA) treated with Isoginkgetin.

(E) Western blotting analysis of SF3B1 in GBM157 neurospheres treated with cisplatin (CP) in the presence or absence of zVAD(OMe)fmk.

All quantitative data are average  $\pm$  SD.

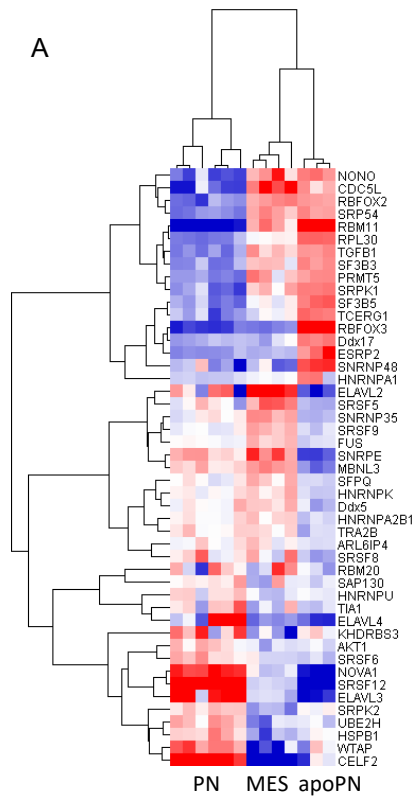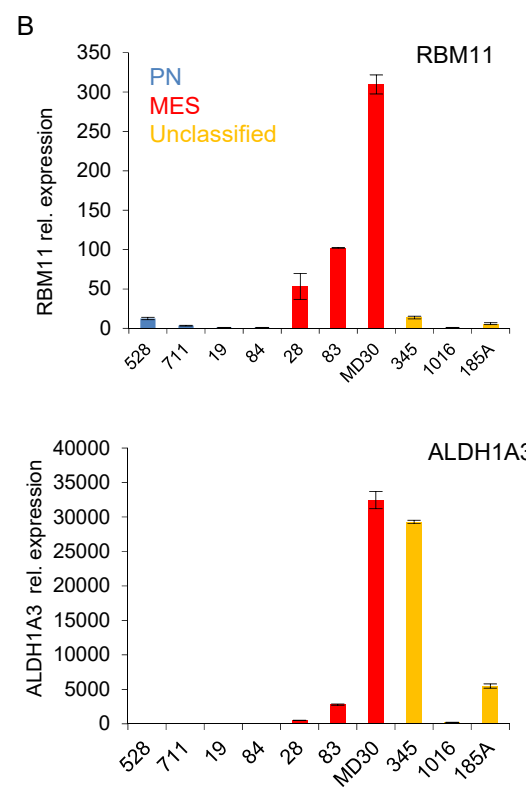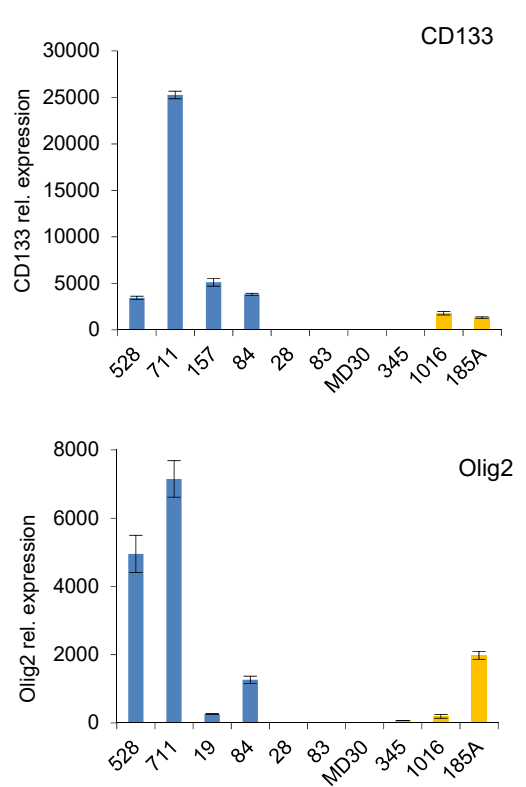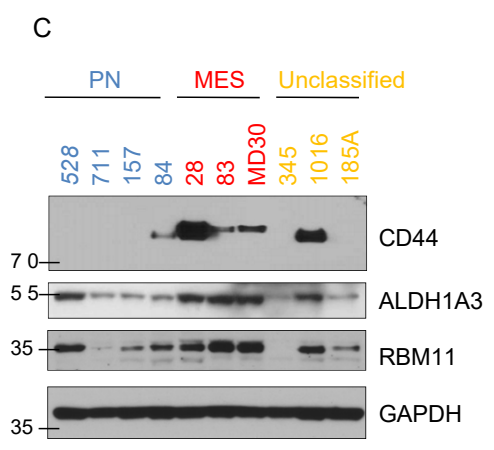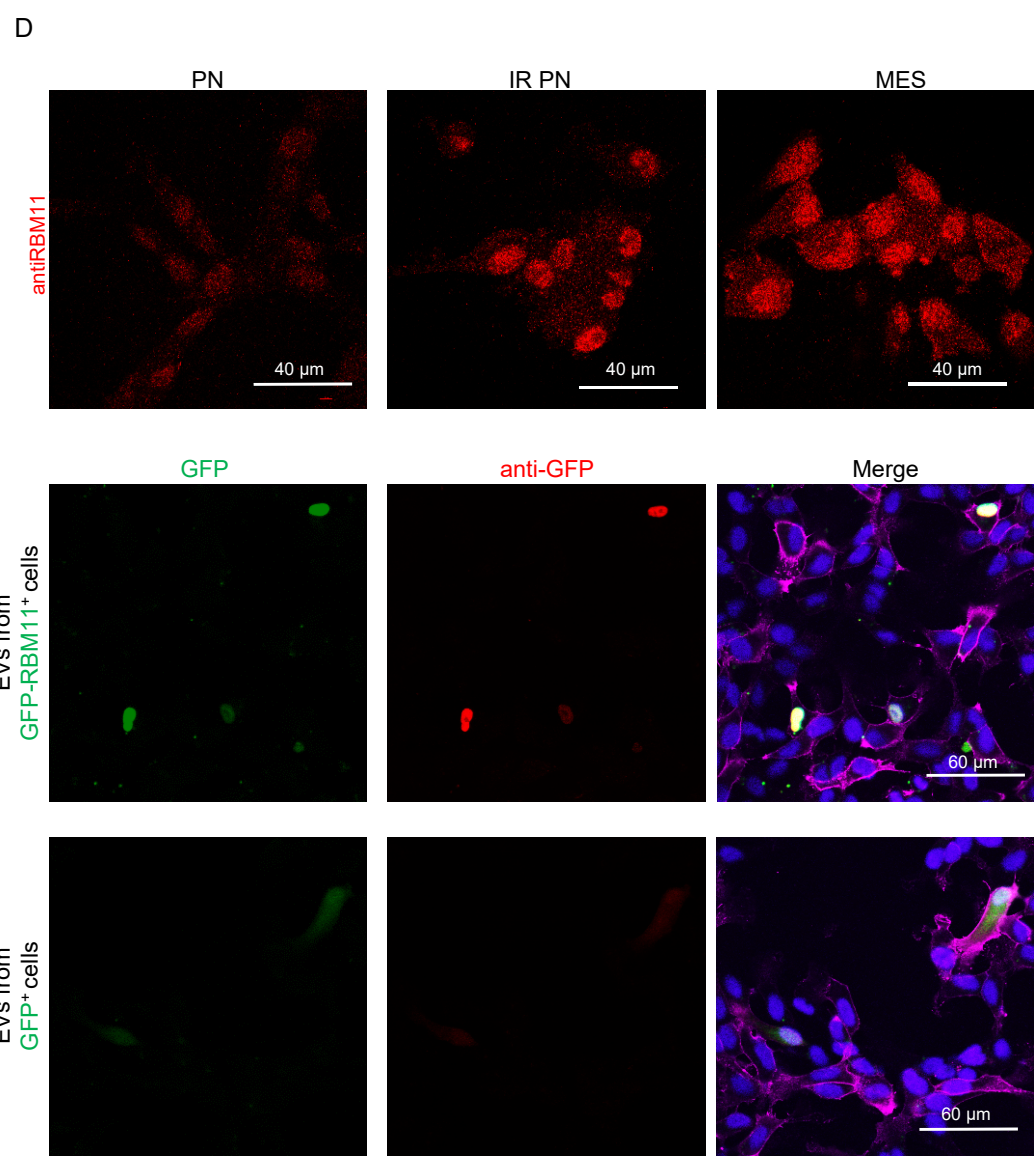

**Figure S6 (Related to Figure 6). RBM11 is mesenchymal specific splicing factor**

(A) Heatmap generated from microarray data showing expression of splicing factor encoding genes in proneural (PN), lethally irradiated proneural (apoPN) and mesenchymal (MES) glioma spheres.

(B) qRT-PCR analysis of ALDH1A3, RBM11, CD133 and Olig2 expression in different glioma sphere lines. PCR data were normalized to GAPDH expression level.

(C) Western blotting analysis of different glioma sphere lines.

(D) Higher resolution images corresponding to panels 6B and 6C.

All quantitative data are average  $\pm$  SD; \*p < 0.01.

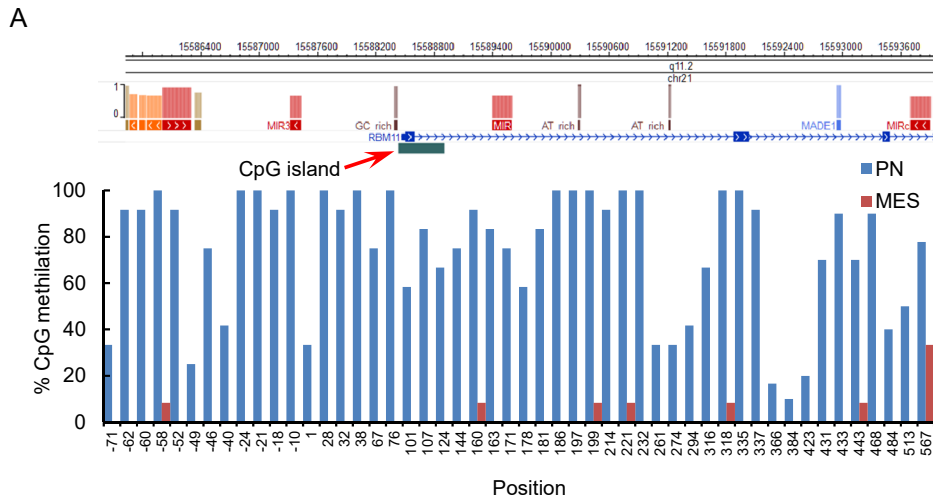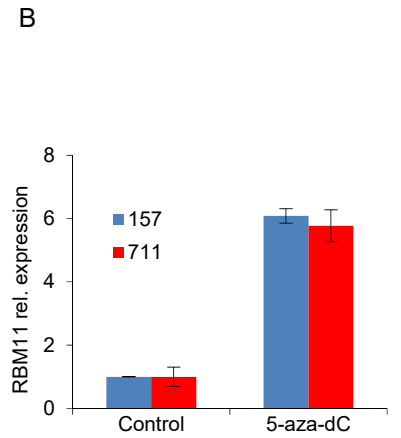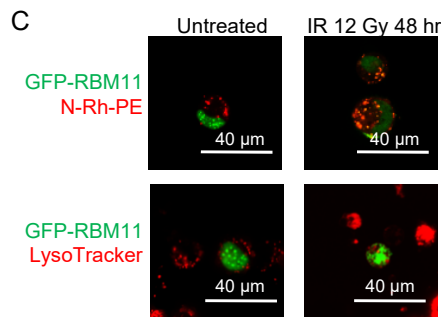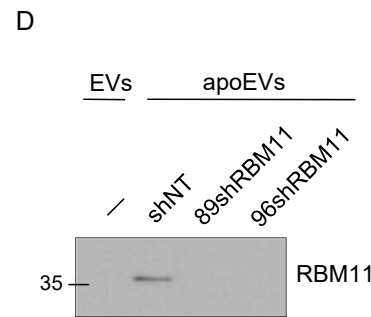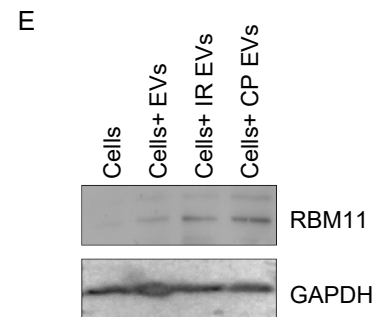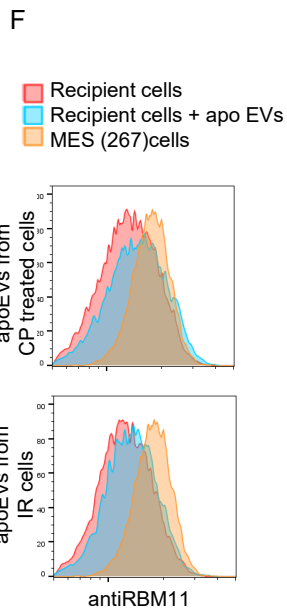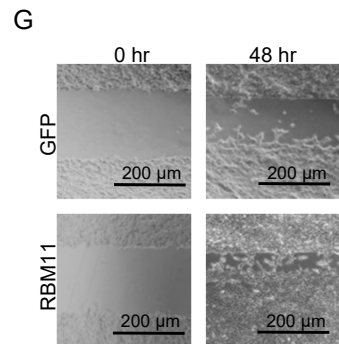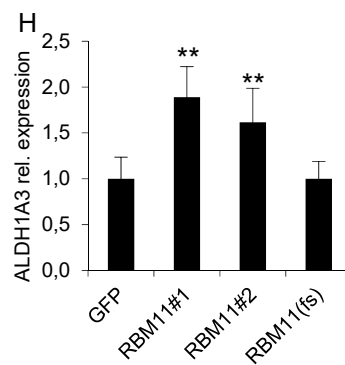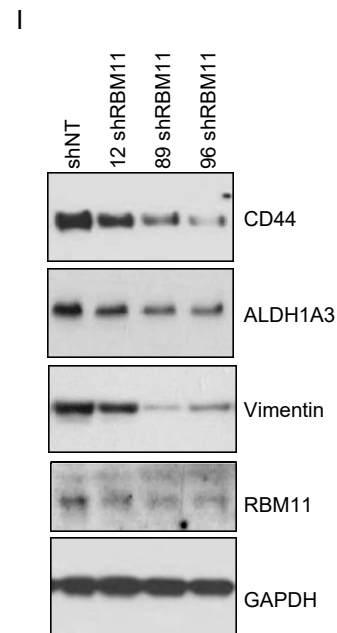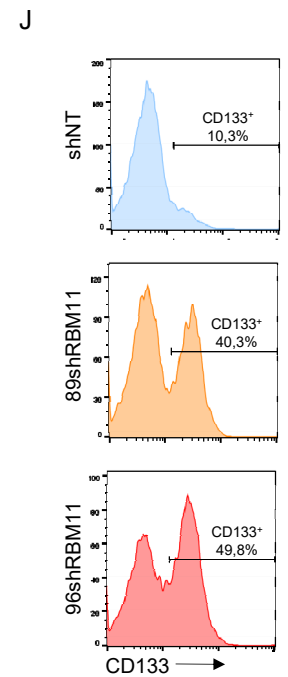

**Figure S7 (Related to Figure 6). Analysis of RBM11 promoter methylation and identification of RBM11 functions in GBM cells**

(A) Schematic representation of the CpG island within the RBM11 promoter region (upper panel) and histogram representing methylation levels of individual CpG dinucleotides within the RBM11 promoter in PN and MES glioma spheres (lower panel). Note that the CpG island in PN glioma spheres is largely hypermethylated, whereas that in MES cells is not.

(B) qRT-PCR analysis of RBM11 expression in GBM157 and GBM711 spheres (both PN) incubated for 4 days in the presence or absence of 5  $\mu$ M of 5-Aza-2'-deoxycytidine – cytosine methylation inhibitor. Obtained data demonstrate increase in RBM11 expression upon inhibition of CpG methylation in PN glioma spheres. PCR data were normalized to GAPDH expression level.

(C) Fluorescence images of GBM157 cells transfected with pTagGFP2-RBM11 plasmid (green). At 24 h after transfection, cells were treated with 50  $\mu$ M cisplatin (CP) for 10 hr, stained for microvesicular bodies with N-Rh-PE (upper panel) or for lysosomes with LysoTracker Deep Red (lower panel), and observed under confocal microscope. Obtained images demonstrate colocalization of RBM11 with microvesicular bodies but not with lysosomes, indicating that RBM11 undergoes export rather than lysosomal degradation in apoptotic cells (Fader et al., 2008). Similar results were obtained with 1  $\mu$ M of staurosporine treatment for 10 hr and 4 days after lethal irradiation.

(D) Western blotting analysis of control EVs or apoEVs purified from lethally-irradiated GBM157 cells, stably expressing shRNA against RBM11 or non target (NT) shRNA as a control.

(E) Western blotting analysis of GBM157 neurospheres incubated with EVs from untreated cells and apoEVs purified from lethally irradiated or CP treated cells for 16 hr, untreated cells were used as a control.

(F) FACS analysis for RBM11 staining of control GBM711 spheres or GBM711 spheres incubated for 10 hr with apoEVs from either lethally irradiated or 50  $\mu$ M cisplatin treated GBM711 cells. 267 spheres (MES) were used as a positive control.

(G) Wound healing assay with GBM157 cells stably expressing either GFP or GFP-RBM11 protein.

(H) qRT-PCR of ALDH1A3 expression in GBM157 cells stably expressing GFP, GFP-RBM11 (two RBM11 isoforms) or GFP-RBM11 frame-shift mutant (fs).

(I) Western blotting analysis of 267 (MES) cells expressing non-target shRNA, or shRNA against RBM11.

(J) FACS analysis for CD133 staining of MES cells expressing non-target shRNA, or shRNA against RBM11.

All quantitative data are average  $\pm$  SD; \*\*p < 0.05.

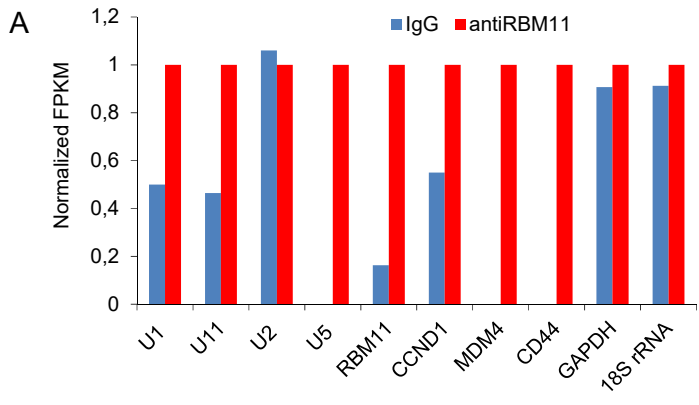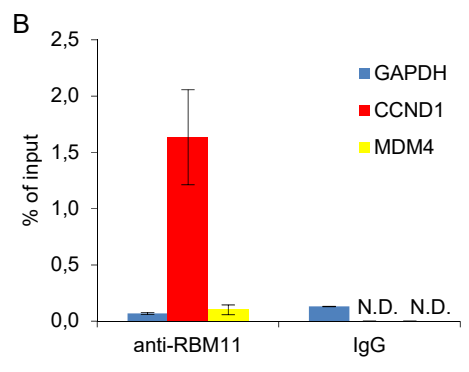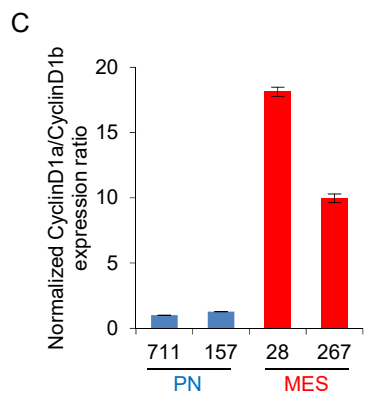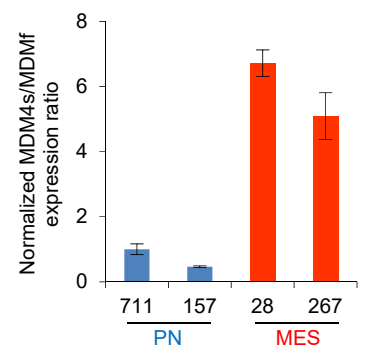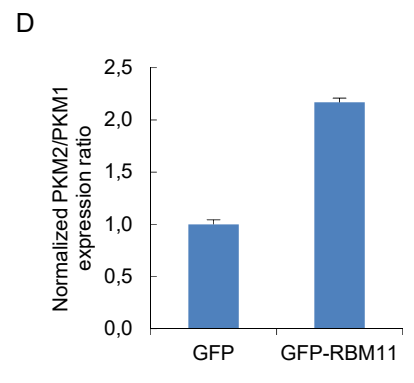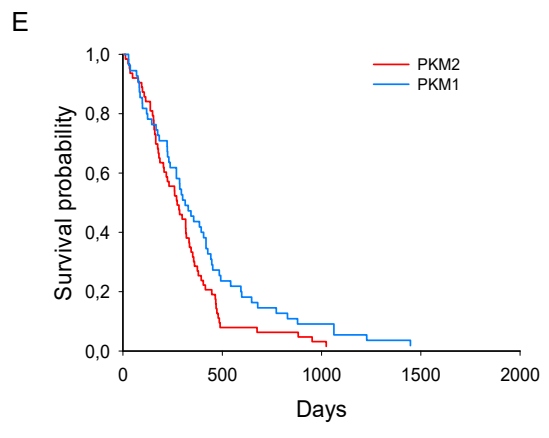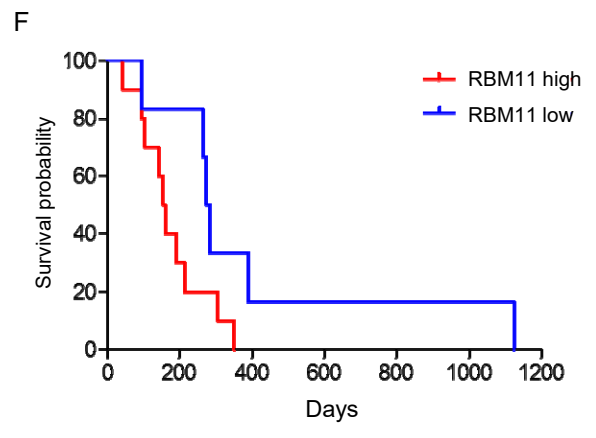

**Figure S8 (Related to Figures 7 and 8). Exogenous RBM11 promotes malignancy of recipient tumor cells**

(A) RNA immunoprecipitation and subsequent RNA-sequencing performed with antibodies against RBM11 or a control IgG. Data demonstrates relative enrichment of U1, U11, U5 snRNAs and RBM11, CyclinD1, MDM4 mRNAs in RBM11 precipitated sample. 18S rRNA and GAPDH mRNA are shown as a control.

(B) Validation of the RNA-IP RNA-sequencing data by qRT-PCR analysis with primers for GAPDH, CyclinD1 and MDM4 (N.D. – not detected).

(C) qRT-PCR analysis of CyclinD1 and MDM4 isoform expression ratios in different glioma sphere lines.

(D) qRT-PCR analysis of PKM isoform expression ratios in GBM157 neurospheres (PN subtype) expressing GFP or GFP-RBM11.

(E) Kaplan-Meier curve showing the overall survival of glioma patients subdivided based on the splicing of PKM ( $p=0.0494$ , log-rank test). RNAseq data were obtained from TCGA database.

(F) Kaplan-Meier curve showing the overall survival of glioma patients ( $n=16$ ) subdivided based on RBM11 immunoreactivity ( $p=0.0767$ , log-rank test), data obtained from the tissue microarray.

All quantitative data are average  $\pm$  SD; \* $p < 0.01$ .
